## Research Paper

# Comparative metabolic and lipidomic profiling of human breast cancer cells with different metastatic potentials

Hye-Youn Kim<sup>1,\*</sup>, Kyung-Min Lee<sup>1,\*</sup>, So-Hyun Kim<sup>1</sup>, Yeo-Jung Kwon<sup>1</sup>, Young-Jin Chun<sup>1</sup>, Hyung-Kyoon Choi<sup>1</sup>

<sup>1</sup> College of Pharmacy, Chung-Ang University, Seoul 156-756, Republic of Korea

\*These authors have contributed equally to this work

**Correspondence to:** Young-Jin Chun, **email:** yjchun@cau.ac.kr  
Hyung-Kyoon Choi, **email:** hykychoi@cau.ac.kr

**Keywords:** metastasis, breast cancer cells, metabolomics, lipidomics, PLSR

**Received:** May 04, 2016

**Accepted:** August 11, 2016

**Published:** August 24, 2016

## ABSTRACT

**This study conducted comprehensive and comparative metabolic and lipidomic profiling of a human epithelial breast cell line (MCF-10A), a slightly metastatic (MCF-7), and a highly metastatic (MDA-MB-231) breast cancer cell line using gas chromatography mass spectrometry (GC-MS) and direct infusion mass spectrometry (DI-MS). Among 39 metabolites identified by GC-MS analysis, xanthine, glucose-6-phosphate, mannose-6-phosphate, guanine, and adenine were selected as prognostic markers of breast cancer metastasis. Major metabolic pathways involved in differentiation of the cell lines were alanine, aspartate, and glutamate metabolism, purine metabolism and glycine, serine, and threonine metabolism. Among 44 intact lipid species identified by DI-MS analysis, the levels of most phospholipids were higher in both metastatic groups than in normal cells. Specifically, the levels of phosphatidylserine (PS) 18:0/20:4, phosphatidylinositol (PI) 18:0/20:4, and phosphatidylcholine (PC) 18:0/20:4 were markedly higher while those of phosphatidylethanolamine (PE) 18:1/18:1 and PI 18:0/18:1 were lower in MDA-MB-231 cells than in MCF-7 cells. A partial-least-squares regression model was developed and validated for predicting the metastatic potential of breast cancer cells. The information obtained in this study will be useful when developing diagnostic tools and for identifying potential therapeutic targets for metastatic breast cancer.**

## INTRODUCTION

Breast cancer is the most common type of cancer in women and the second most common type of cancer overall worldwide. In Europe, Belgium has the highest prevalence of breast cancer, approximately 112 per 100,000 population (World Cancer Research Fund International statistics available at <http://www.wcrf.org/int/cancer-facts-figures/data-specific-cancers/breast-cancer-statistics>). Among Asian countries, the incidence has increased rapidly in recent years. Especially, in South Korea and Japan, the incidence rates of breast cancer have increased by 6% annually [1]. Adjuvant chemotherapy is offered to most breast cancer patients, but about 40% of early-stage breast cancer patients are at risk of developing distant metastases, which can result in death [2].

Biological markers are needed to identify patients with developing metastases and to improve the clinical management of the disease. Potential biomarkers have been investigated for predicting breast cancer metastases, with some showing clinical efficacy. The developed markers that have true prognostic use for patients with breast cancer include the level of urokinase-type plasminogen activator/plasminogen activator inhibitor 1 protein (uPA/PAI1), steroid-receptor expression, and epidermal growth factor receptor 2 (ERBB2) gene amplification and protein expression [3]. Overexpression of enzymes that degrade the extracellular matrix, such as uPA and matrix metalloproteinases, and oncoproteins such as ERBB2, ras, and c-Myc are known to be associated with a high risk of metastasis [3, 4]. Steroid receptor coactivator-1 expression is known to promote metastasis and is inversely correlated with estrogen receptor (ER)  $\beta$

expression, which is a predictor of a better prognosis in breast cancer [4].

Metabolic profiling has been used to study comprehensive responses when characterizing tumor types in clinical research. Cancer cell analyses using metabolomic techniques have been reported using mass spectrometry for ovarian cancer and other gastrointestinal cancers such as pancreatic cancer and colorectal cancer [5–7]. The construction of a metabolic map of a large cohort of breast cancer tissues and plasma using gas chromatography mass spectrometry (GC-MS), and comparative lipid profiling between breast cancer and normal tissues from humans using ultra-performance liquid chromatography mass spectrometry (UPLC-MS) have been reported [8–10]. In addition, lipidomic analyses of mouse breast cancer cell lines [11] and human breast ductal carcinoma (T47-D) and adenocarcinoma (MDA-MB-231) cell lines have been carried out using thin-layer-chromatography mass spectrometry (TLC-MS) [12].

Two human breast cancer cell lines, MCF-7 and MDA-MB-231, are known to present with different metastasis and metastatic properties and ER positivity in human breast cancers. ER<sup>+</sup> MCF-7 cells are highly hormone-dependent for growth and have a comparatively low capacity for metastasis among breast tumor cells, while ER<sup>−</sup> MDA-MB-231 cells are completely hormone-independent and exhibit a high metastatic potential [13, 14]. Previous studies have used these cell lines to identify and assess alterations in genes and proteins associated with metastasis in breast cancer using various types of genomic and proteomic analyses. Of 12,625 genes, 26 were increased in both MCF-7 and MDA-MB-231 cells by hypoxia [13], and the expression of miR-125 was lower in MCF-7 cells but higher in MDA-MB-231 cells than in MCF-10A cells [14]. The level of 14-3-3 $\sigma$  protein was strongly decreased in MCF-7 and MDA-MB-231 cells and in primary breast carcinomas compared to normal cells [15]. However, no previous studies have performed comparative metabolomic and lipidomic profiling of breast cancer cell lines (MCF-7 and MDA-MB-231) with different degrees of metastasis.

In this study, we performed comprehensive and comparative metabolomic and lipidomic profiling of breast cancer cell lines with different degrees of metastasis (MCF-7 and MDA-MB-231 cells) using GC-MS and direct infusion mass spectrometry (DI-MS) for the first time. In particular, DI-MS analysis using nano-electrospray mass spectrometry facilitated the analysis of intact lipid species in a rapid, simple, and highly sensitive manner. In addition, a predictive model for the metastasis stage of breast cancer was developed using the metabolic and lipidomic data sets obtained in this study by partial-least-squares discriminant analysis (PLS-DA) and partial-least-squares (PLS) projection to latent structures regression.

## RESULTS

### Comparative metabolic profiling of breast cancer cells with different metastatic potentials using GC-MS

Comprehensive metabolic profiling of human mammary epithelial and breast cancer cell extracts was performed using GC-MS to investigate the profiles of major compounds that are detected in breast cancer cells according to different metastasis stages. As listed in Table 1, the following 39 metabolites were identified in human mammary epithelial and breast cancer cells: 2 alcohols (erythritol and myo-inositol), 14 amino acids (alanine, asparagine, aspartic acid, glutamine, glycine, leucine, lysine, ornithine, proline, serine, threonine, tryptophan, tyrosine, and valine), 4 fatty acids (3-hydroxybutanoic acid, oleic acid, palmitic acid, and stearic acid), 5 organic acids (isocitric acid, lactic acid, malic acid, oxalic acid, and pyruvic acid), 6 purines (adenine, guanine, hypoxanthine, inosine, uracil, and xanthine), 7 sugars (6-phosphogluconic acid, fructose-6-phosphate, glucose, glucose-6-phosphate, glyceric acid, mannose-6-phosphate, and sucrose), and creatinine.

Figure 1 depicts the interconnecting cellular metabolic pathways with superimposed levels of metabolites found in human breast cells with varying degrees of metastasis; the corresponding data are provided in Supplementary Table S1. ANOVA was performed to assess the statistical significance of the relative levels of each metabolite among different samples ( $p < 0.05$ ). The levels of one alcohol (erythritol), amino acids (asparagine, glutamine, proline, serine, threonine, tyrosine, and valine), organic acids (isocitric acid, lactic acid, and malic acid), one purine (guanine), one sugar (glyceric acid), and creatinine were significantly higher in slightly metastatic cancer cells (MCF-7) than in normal breast cells (MCF-10A) and highly metastatic cells (MDA-MB-231). In contrast, the levels of purines such as uracil and xanthine and sugars such as fructose-6-phosphate, glucose-6-phosphate, and mannose-6-phosphate were significantly lower in MCF-7 cells than in MCF-10A and MDA-MB-231 cells.

In highly metastatic cells (MDA-MB-231), the levels of alcohol (including erythritol), amino acids (including asparagine, glutamine, proline, serine, threonine, tyrosine, and valine), organic acids (including lactic acid and malic acid), purine (including inosine), and creatinine were reduced. In contrast, the level of uracil was higher than that in normal cells (MCF-10A). Isocitric acid and guanine levels remained high, whereas xanthine, fructose-6-phosphate, and mannose-6-phosphate levels stayed low. The levels of myo-inositol, ornithine, 3-hydroxybutanoic acid, oxalic acid, and adenine were significantly higher while the levels of hypoxanthine were significantly lower in MDA-MB-231 cells than in MCF-7

**Table 1: Mass fragment of metabolites contained in breast cancer cells and human mammary epithelial cells**

| Compound               | RT (min) | Fragmentation ion (m/z)    | TMS <sup>a</sup> |
|------------------------|----------|----------------------------|------------------|
| <b>Alcohol</b>         |          |                            |                  |
| Erythritol             | 19.03    | 103, 129, 205, <b>217</b>  | 4                |
|                        | 19.05    |                            |                  |
| Myo-inositol           | 28.95    | 191, 217, 265, <b>305</b>  | 6                |
| <b>Amino acid</b>      |          |                            |                  |
| Alanine                | 7.00     | <b>116</b> , 133, 190, 218 | 2                |
| Asparagine             | 20.85    | <b>116</b> , 132, 188, 231 | 3                |
| Aspartic acid          | 15.06    | 117, 130, <b>160</b> , 245 | 2                |
|                        | 17.41    |                            |                  |
|                        | 17.43    |                            |                  |
| Glutamine              | 19.78    | 128, 230, <b>246</b> , 348 | 3                |
|                        | 19.79    |                            |                  |
|                        | 19.81    |                            |                  |
|                        | 23.11    | <b>156</b> , 203, 246, 347 | 3                |
| Glycine                | 7.47     | 86, <b>102</b> , 176, 204  | 2                |
|                        | 12.02    | 86, <b>174</b> , 248, 276  | 3                |
|                        | 12.03    |                            |                  |
| Leucine                | 8.30     | <b>86</b> , 103, 170, 188  | 1                |
|                        | 11.72    | <b>158</b> , 218, 232, 260 | 2                |
| Lysine                 | 26.08    | 156, <b>174</b> , 230, 317 | 4                |
| Ornithine              | 24.00    | 100, <b>142</b> , 200, 420 | 4                |
| Proline                | 11.81    | 133, <b>142</b> , 216, 230 | 2                |
| Serine                 | 10.81    | 103, 116, <b>132</b> , 219 | 2                |
|                        | 13.45    | 100, <b>204</b> , 218, 278 | 3                |
| Threonine              | 11.74    | <b>117</b> , 130, 158, 219 | 2                |
|                        | 11.75    |                            |                  |
|                        | 14.08    | 117, <b>218</b> , 291, 320 | 3                |
|                        | 14.09    |                            |                  |
| Tryptophan             | 30.92    | <b>202</b> , 218, 291, 405 | 3                |
| Tyrosine               | 26.37    | 179, <b>218</b> , 280, 382 | 3                |
| Valine                 | 6.71     | <b>72</b> , 130, 156, 174  | 1                |
|                        | 9.74     | 100, <b>144</b> , 174, 218 | 2                |
|                        | 9.76     |                            |                  |
| <b>Fatty acid</b>      |          |                            |                  |
| 3-hydroxybutanoic acid | 8.05     | 117, 130, <b>191</b> , 204 | 2                |
| Oleic acid             | 31.08    | <b>117</b> , 129, 145, 339 | 1                |
| Palmitic acid          | 28.36    | 117, 129, 145, <b>313</b>  | 1                |
| Stearic acid           | 31.49    | <b>117</b> , 129, 145, 341 | 1                |

(Continued)

| Compound               | RT (min) | Fragmentation ion (m/z) | TMS <sup>a</sup> |
|------------------------|----------|-------------------------|------------------|
| <b>Organic acid</b>    |          |                         |                  |
| Isocitric acid         | 24.07    | 273, 305, 347, 465      | 4                |
| Lactic acid            | 6.04     | 117, 133, 191, 219      | 2                |
| Malic acid             | 16.67    | 189, 233, 245, 335      | 3                |
| Oxalic acid            | 7.90     | 100, 117, 133, 190      | 2                |
| Pyruvic acid           | 7.63     | 89, 131, 189, 218       | 2                |
| <b>Purine</b>          |          |                         |                  |
| Adenine                | 24.95    | 116, 133, 190, 218      | 2                |
| Guanine                | 29.59    | 171, 264, 352, 367      | 3                |
| Hypoxanthine           | 23.73    | 193, 206, 265, 280      | 2                |
| Inosine                | 36.11    | 193, 217, 245, 281      | 4                |
| Uracil                 | 12.86    | 99, 113, 241, 256       | 2                |
| Xanthine               | 27.80    | 279, 294, 353, 368      | 3                |
| <b>Sugar</b>           |          |                         |                  |
| 6-phosphogluconic acid | 33.93    | 217, 299, 357, 387      | 7                |
| Fructose-6-phosphate   | 32.31    | 217, 315, 357, 387      | 6                |
| Glucose                | 27.15    | 129, 191, 204, 217      | 5                |
| Glucose-6-phosphate    | 32.32    | 129, 204, 299, 387      | 6                |
|                        | 32.49    |                         |                  |
|                        | 32.74    |                         |                  |
|                        | 33.03    |                         |                  |
|                        | 33.33    |                         |                  |
|                        | 33.50    |                         |                  |
| Glyceric acid          | 12.67    |                         |                  |
| Mannose-6-phosphate    | 35.72    | 217, 299, 357, 387      | 6                |
| Sucrose                | 36.96    | 217, 271, 361, 437      | 8                |
| <b>Other</b>           |          |                         |                  |
| Creatinine             | 18.10    | 100, 115, 143, 329      | 3                |

<sup>a</sup> TMS = trimethylsilylation.

cells. The glucose-6-phosphate level was also higher in MDA-MB-231 cells than in MCF-7 cells, but was not as high as that in MCF-10A cells.

Major pathways involved in the metabolic networks of human mammary epithelial and breast cancer cells were determined by annotating the identified metabolites using the MetaboAnalyst platform (<http://www.metaboanalyst.ca>). A list of 39 identified metabolites was used as an input for pathway analysis, and *Homo sapiens* (human; 80 pathways) was selected for further enrichment analyses. The most relevant pathways and metabolites that were strongly represented

in metastatic breast cancer cells are listed in Table 2. These metabolic pathways were selected using the impact score and  $-\log(p)$  value. The impact score was determined by the pathway topological importance of the metabolites, and  $-\log(p)$  was used as the enrichment score, reflecting the probability of the pathway being identified at random; the number of 'Hits' was the actual number of matched metabolites in the pathway [16]. The following 10 metabolites were associated with aminoacyl-tRNA biosynthesis ( $p = 0.000$ ): asparagine, leucine, lysine, glutamine, glycine, proline, serine, threonine, tyrosine, and valine. The following seven



metabolites were associated with purine metabolism ( $p = 0.001$ ): adenine, glutamine, glycine, guanine, hypoxanthine, inosine, and xanthine. In addition, five metabolites were associated with glycine, serine, and threonine metabolism (glyceric acid, glycine, pyruvic acid, serine, and threonine;  $p = 0.001$ ) and with arginine and proline metabolism (creatinine, glutamine, ornithine, proline, and pyruvic acid;  $p = 0.007$ ). Moreover, alanine, aspartate, and glutamate metabolism; glyoxylate and dicarboxylate metabolism; the pentose phosphate pathway; glycolysis or gluconeogenesis; starch and sucrose metabolism; and the tricarboxylic acid cycle were all associated with the metastasis of breast cancer cells. These various metabolic networks represent potential therapeutic targets that could be utilized in the development of new anticancer drugs for breast cancer.

### Comparative lipidomic profiling of breast cancer cells with different metastatic potentials using DI-MS

The nonpolar phase of extracts from human mammary epithelial and breast cancer cells, was used to investigate the lipid profile. Representative lipid spectra of samples derived from a pooled extract and MS/MS spectra of the assigned 44 intact lipids are presented in Supplementary Figure S1 and S2. In total, 10 phosphatidylcholine (PC) species and one each of plasmenylphosphatidylcholine (plasmenyl-PC), plasmenylphosphatidylethanolamine (plasmenyl-PE), and sphingomyelin (SM) species were detected in positive ion mode, while four phosphatidylethanolamine (PE), one plasmenyl-PE, fifteen phosphatidylserine (PS), nine phosphatidylinositol (PI), and two phosphatidylglycerol (PG) species were detected in negative ion mode. In addition to identifying lipid species in the three different cell types, the relative abundance of each lipid in relation to the metastatic potential is listed in Supplementary Table S2. ANOVA with a Tukey's *post hoc* test revealed significant differences between the cell groups ( $p < 0.05$ ).

Table 3 lists the relative changes in lipid species between MCF-7 and MCF-10A cells, MDA-MB-231 and MCF-10A cells, and MDA-MB-231 and MCF-7 cells, with  $p$  values determined using Student's *t*-tests. The relative changes between cell types ranged from 0.10- to 17.01-fold. All PCs, PEs, and PGs showed relative changes of >1.0-fold in MCF-7 cells, most or all PCs, PEs, PSs, and PIs also showed relative changes of >1.0-fold in MDA-MB-231 cells relative to the corresponding levels found in MCF-10A cells. In addition, compared to MDA-MB-231 and MCF-7, the relative changes in plasmenyl-PEs and most of the identified PSs and PIs were greater than 1.0-fold (which indicates higher levels in MDA-MB-231 than in MCF-7 cells), whereas those of plasmenyl-PC, PEs, and PGs were less than 1.0-fold (which indicates lower levels

in MDA-MB-231 than in MCF-7 cells), and most PCs and SM levels did not change significantly.

### Development of a predictive model for breast cancer cells according to the metastatic potential

To obtain models that enable discrimination of the three different cell types, and identify potential biomarkers for breast cancer, PLS-DA was performed using the total GC-MS and DI-MS data sets from normal cells (MCF-10A), slightly metastatic cells (MCF-7), and highly metastatic cells (MDA-MB-231). The variable influence on projection (VIP) value reflects the influence of components that contribute to separation in the PLS-DA models. Generally, VIP cutoff values of 0.7–0.8 have been accepted for variable selection, with those larger than 1.0 being the most influential for the model [17]. In this study, six PLS-DA models were developed for compounds selected using various VIP cutoff values (0, 0.7, 0.9, 1.0, 1.1, and 1.2) to predict breast cancer metastasis. The optimal PLS-DA model was determined based on the values of  $R^2Y$  (goodness-of-fit parameter) and  $Q^2Y$  (predictive ability parameter), with values close to 1 being indicative of a perfect model. The best  $R^2Y$  value of 0.990 and  $Q^2Y$  value of 0.984 were obtained when the VIP cutoff value was >1.1 (Table 4). The PLS-DA model validity was investigated by performing 20-times random permutation testing, with the results showing that the model was valid (with an  $R^2Y$  intercept of 0.019 and a  $Q^2Y$  intercept of -0.336). In addition, the score plot derived from the optimal PLS-DA model demonstrated that the normal group and two breast cancer groups could be clearly separated by PLS component 1, and that the slightly metastatic and highly metastatic cancer groups could be separated by PLS component 2 (Figure 2A). The corresponding loading plot showed the important variables responsible for the clustering observed in the score plot. From the loading plot, glucose-6-phosphate, xanthine, and mannose-6-phosphate were assigned as key metabolites in MCF-10A cells, and the levels of PI 16:0/18:1, PS 17:0/18:1, and PE 18:1/20:4 were highest in MCF-7 cells. Adenine, PS 18:0/20:4, and PI 18:0/20:4 were identified as the main metabolites in MDA-MB-231 cells responsible for discrimination among groups (Figure 2B).

For external validation, a PLS regression model was developed from the training data set of five individual samples of each of MCF-10A, MCF-7, and MDA-MB-231 cells, and contained variables with optimal VIP values. Cross-validation and permutation testing were performed to validate the prediction model, and the differences between the observed and predicted metastatic potentials of breast cancer cells were calculated and expressed as the root-mean-square error of estimation (RMSEE). In addition, one experimental data set from an independent sample was used as the test set and was imported into the PLS calibration plot—constructed by the training set—to

**Table 2: List of selected pathways identified by pathway analysis using MetaboAnalyst**

| No. | Interaction metabolite                                                                        | Pathway name                                | Total compd <sup>a</sup> | Expected | Hits <sup>b</sup> | Raw <i>p</i> <sup>c</sup> | -log( <i>p</i> ) | Impact <sup>d</sup> |
|-----|-----------------------------------------------------------------------------------------------|---------------------------------------------|--------------------------|----------|-------------------|---------------------------|------------------|---------------------|
| 1   | Glyceric acid, glycine, pyruvic acid, serine, threonine                                       | Glycine, serine and threonine metabolism    | 48                       | 0.78     | 5                 | 0.0009                    | 7.0325           | 0.4209              |
| 2   | Asparagine, aspartic acid, glutamine, pyruvic acid                                            | Alanine, aspartate and glutamate metabolism | 24                       | 0.39     | 4                 | 0.0005                    | 7.6095           | 0.2754              |
| 3   | Creatinine, glutamine, ornithine, proline, pyruvic acid                                       | Arginine and proline metabolism             | 77                       | 1.25     | 5                 | 0.0072                    | 4.9304           | 0.2383              |
| 4   | Glyceric acid, isocitric acid, pyruvic acid, oxalic acid                                      | Glyoxylate and dicarboxylate metabolism     | 50                       | 0.81     | 4                 | 0.0079                    | 4.8364           | 0.1868              |
| 5   | 6-phosphogluconic acid, glucose, glyceric acid, pyruvic acid                                  | Pentose phosphate pathway                   | 32                       | 0.52     | 4                 | 0.0015                    | 6.4838           | 0.1574              |
| 6   | Isocitric acid, pyruvic acid                                                                  | Citrate cycle (TCA cycle)                   | 20                       | 0.32     | 2                 | 0.0404                    | 3.2077           | 0.1485              |
| 7   | Asparagine, leucine, lysine, glutamine, glycine, proline, serine, threonine, tyrosine, valine | Aminoacyl-tRNA biosynthesis                 | 75                       | 1.22     | 10                | 0.0000                    | 15.75            | 0.1127              |
| 8   | Glucose, lactic acid, pyruvic acid                                                            | Glycolysis or Gluconeogenesis               | 31                       | 0.50     | 3                 | 0.0129                    | 4.3487           | 0.0953              |
| 9   | Glucose, glucose-6-phosphate, sucrose                                                         | Starch and sucrose metabolism               | 50                       | 0.81     | 3                 | 0.0456                    | 3.0869           | 0.0768              |
| 10  | Adenine, glutamine, glycine, guanine, hypoxanthine, inosine, xanthine                         | Purine metabolism                           | 92                       | 1.49     | 7                 | 0.0005                    | 7.5315           | 0.0636              |

<sup>a</sup> Total compd is the total number of compounds in the pathway.

<sup>b</sup> Hits is the actual matched number from the uploaded data.

<sup>c</sup> Raw *p* is the original *p*-value calculated from the pathway analysis.

<sup>d</sup> Impact is the pathway impact value calculated from pathway topology analysis.

**Table 3: Identification of lipid species from human MCF-10A mammary epithelial cells and MCF-7 and MDA-MB-231 human breast cancer cells by nano-electrospray mass spectrometry, along with *p* values and relative changes in identified peak intensities**

| Ion mode | Ion species          | m/z | Proposed composition | MCF-7/MCF-10A |             | MDA-MB-231/MCF-10A |             | MDA-MB-231/MCF-7 |             |
|----------|----------------------|-----|----------------------|---------------|-------------|--------------------|-------------|------------------|-------------|
|          |                      |     |                      | <i>p</i>      | Fold change | <i>p</i>           | Fold change | <i>p</i>         | Fold change |
| PC       |                      |     |                      |               |             |                    |             |                  |             |
| (+)      | [M + H] <sup>+</sup> | 758 | C16:1/C18:1          | 0.000         | 1.99 (↑)    | 0.000              | 2.47 (↑)    | 0.136            | 1.24 (ns)   |
| (+)      | [M + H] <sup>+</sup> | 784 | C18:1/C18:2          | 0.000         | 2.40 (↑)    | 0.004              | 4.10 (↑)    | 0.063            | 1.71 (ns)   |
| (+)      | [M + H] <sup>+</sup> | 786 | C18:1/C18:1          | 0.000         | 2.54 (↑)    | 0.002              | 4.07 (↑)    | 0.064            | 1.60 (ns)   |

(Continued)

| Ion mode     | Ion species          | m/z | Proposed composition | MCF-7/MCF-10A |             | MDA-MB-231/MCF-10A |             | MDA-MB-231/MCF-7 |             |
|--------------|----------------------|-----|----------------------|---------------|-------------|--------------------|-------------|------------------|-------------|
|              |                      |     |                      | <i>p</i>      | Fold change | <i>p</i>           | Fold change | <i>p</i>         | Fold change |
| (+)          | [M + H] <sup>+</sup> | 798 | C18:3/C19:0          | 0.287         | 1.43 (ns)   | 0.636              | 1.16 (ns)   | 0.240            | 0.81 (ns)   |
| (+)          | [M + H] <sup>+</sup> | 808 | C18:2/C20:3          | 0.000         | 3.19 (↑)    | 0.005              | 4.48 (↑)    | 0.223            | 1.40 (ns)   |
| (+)          | [M + H] <sup>+</sup> | 810 | C18:0/C20:4          | 0.004         | 1.59 (↑)    | 0.000              | 4.48 (↑)    | 0.000            | 2.81 (↑)    |
| (+)          | [M + H] <sup>+</sup> | 814 | C18:1/C20:1          | 0.000         | 1.87 (↑)    | 0.829              | 1.02 (ns)   | 0.000            | 0.55 (↓)    |
| (+)          | [M + H] <sup>+</sup> | 816 | C18:1/C20:0          | 0.001         | 1.57 (↑)    | 0.000              | 1.83 (↑)    | 0.145            | 1.16 (ns)   |
| (+)          | [M + H] <sup>+</sup> | 818 | C18:0/C20:0          | 0.192         | 1.51 (ns)   | 0.017              | 2.28 (↑)    | 0.134            | 1.51 (ns)   |
| (+)          | [M + H] <sup>+</sup> | 834 | C18:1/C22:5          | 0.000         | 1.57 (↑)    | 0.000              | 1.52 (↑)    | 0.634            | 0.97 (ns)   |
| plasmenyl-PC |                      |     |                      |               |             |                    |             |                  |             |
| (+)          | [M + H] <sup>+</sup> | 800 | C20:0/C18:1          | 0.000         | 1.93 (↑)    | 0.859              | 0.95 (ns)   | 0.004            | 0.49 (↓)    |
| plasmenyl-PE |                      |     |                      |               |             |                    |             |                  |             |
| (+)          | [M + H] <sup>+</sup> | 704 | C18:0/C16:0          | 0.108         | 1.49 (ns)   | 0.028              | 1.53 (↑)    | 0.886            | 1.02 (ns)   |
| SM           |                      |     |                      |               |             |                    |             |                  |             |
| (+)          | [M] <sup>+</sup>     | 703 | D18:1/16:0           | 0.750         | 1.09 (ns)   | 0.094              | 1.50 (ns)   | 0.157            | 1.37 (ns)   |
| PE           |                      |     |                      |               |             |                    |             |                  |             |
| (-)          | [M - H] <sup>-</sup> | 742 | C18:1/C18:1          | 0.000         | 1.62 (↑)    | 0.000              | 0.47 (↓)    | 0.000            | 0.29 (↓)    |
| (-)          | [M - H] <sup>-</sup> | 746 | C17:0/C19:0          | 0.000         | 2.62 (↑)    | 0.047              | 1.56 (↑)    | 0.002            | 0.60 (↓)    |
| (-)          | [M - H] <sup>-</sup> | 764 | C18:1/C20:4          | 0.000         | 2.68 (↑)    | 0.035              | 1.23 (↑)    | 0.000            | 0.46 (↓)    |
| (-)          | [M - H] <sup>-</sup> | 792 | C18:1/C22:4          | 0.000         | 1.67 (↑)    | 0.002              | 1.55 (↑)    | 0.350            | 0.93 (ns)   |
| plasmenyl-PE |                      |     |                      |               |             |                    |             |                  |             |
| (-)          | [M - H] <sup>-</sup> | 750 | C18:0/C20:4          | 0.000         | 0.36 (↓)    | 0.000              | 2.87 (↑)    | 0.000            | 7.90 (↑)    |
| PS           |                      |     |                      |               |             |                    |             |                  |             |
| (-)          | [M - H] <sup>-</sup> | 758 | C16:1/C18:1          | 0.000         | 1.98 (↑)    | 0.000              | 3.32 (↑)    | 0.001            | 1.67 (↑)    |
| (-)          | [M - H] <sup>-</sup> | 760 | C16:0/C18:1          | 0.000         | 1.48 (↑)    | 0.000              | 2.44 (↑)    | 0.000            | 1.65 (↑)    |
| (-)          | [M - H] <sup>-</sup> | 762 | C16:0/C18:0          | 0.006         | 1.22 (↑)    | 0.000              | 2.06 (↑)    | 0.000            | 1.70 (↑)    |
| (-)          | [M - H] <sup>-</sup> | 774 | C17:0/C18:1          | 0.000         | 2.46 (↑)    | 0.025              | 1.21 (↑)    | 0.000            | 0.49 (↓)    |
| (-)          | [M - H] <sup>-</sup> | 784 | C18:1/C18:2          | 0.000         | 0.60 (↓)    | 0.000              | 3.29 (↑)    | 0.000            | 5.45 (↑)    |
| (-)          | [M - H] <sup>-</sup> | 786 | C18:0/C18:2          | 0.796         | 0.99 (ns)   | 0.000              | 2.12 (↑)    | 0.000            | 2.15 (↑)    |
| (-)          | [M - H] <sup>-</sup> | 788 | C18:0/C18:1          | 0.007         | 0.86 (↓)    | 0.000              | 2.04 (↑)    | 0.000            | 2.37 (↑)    |
| (-)          | [M - H] <sup>-</sup> | 790 | C18:0/C18:0          | 0.000         | 2.01 (↑)    | 0.000              | 2.11 (↑)    | 0.241            | 1.05 (ns)   |
| (-)          | [M - H] <sup>-</sup> | 810 | C18:0/C20:4          | 0.468         | 1.07 (ns)   | 0.000              | 4.43 (↑)    | 0.000            | 4.15 (↑)    |
| (-)          | [M - H] <sup>-</sup> | 816 | C18:1/C20:0          | 0.000         | 1.57 (↑)    | 0.000              | 1.40 (↑)    | 0.031            | 0.90 (↓)    |
| (-)          | [M - H] <sup>-</sup> | 834 | C18:0/C22:6          | 0.000         | 1.19 (↑)    | 0.000              | 4.17 (↑)    | 0.000            | 2.15 (↑)    |
| (-)          | [M - H] <sup>-</sup> | 836 | C18:1/C22:4          | 0.000         | 2.45 (↑)    | 0.000              | 2.41 (↑)    | 0.716            | 0.98 (ns)   |
| (-)          | [M - H] <sup>-</sup> | 838 | C18:0/C22:4          | 0.331         | 1.07 (ns)   | 0.000              | 3.76 (↑)    | 0.000            | 3.52 (↑)    |
| (-)          | [M - H] <sup>-</sup> | 842 | C18:1/C22:1          | 0.000         | 0.64 (↓)    | 0.180              | 1.07 (ns)   | 0.000            | 1.67 (↑)    |
| (-)          | [M - H] <sup>-</sup> | 844 | C18:1/C22:0          | 0.000         | 1.58 (↑)    | 0.000              | 1.37 (↑)    | 0.111            | 0.87 (ns)   |

(Continued)

| Ion mode | Ion species          | m/z | Proposed composition | MCF-7/MCF-10A |             | MDA-MB-231/MCF-10A |             | MDA-MB-231/MCF-7 |             |
|----------|----------------------|-----|----------------------|---------------|-------------|--------------------|-------------|------------------|-------------|
|          |                      |     |                      | <i>p</i>      | Fold change | <i>p</i>           | Fold change | <i>p</i>         | Fold change |
| PI       |                      |     |                      |               |             |                    |             |                  |             |
| (−)      | [M − H] <sup>−</sup> | 807 | C16:0/C16:1          | 0.000         | 3.23 (↑)    | 0.000              | 17.01 (↑)   | 0.000            | 5.27 (↑)    |
| (−)      | [M − H] <sup>−</sup> | 833 | C16:1/C18:1          | 0.021         | 1.14 (↑)    | 0.000              | 2.10 (↑)    | 0.000            | 1.84 (↑)    |
| (−)      | [M − H] <sup>−</sup> | 835 | C16:0/C18:1          | 0.000         | 2.46 (↑)    | 0.009              | 1.40 (↑)    | 0.000            | 0.57 (↓)    |
| (−)      | [M − H] <sup>−</sup> | 861 | C18:1/C18:1          | 0.000         | 0.66 (↓)    | 0.000              | 0.25 (↓)    | 0.000            | 0.37 (↓)    |
| (−)      | [M − H] <sup>−</sup> | 863 | C18:0/C18:1          | 0.000         | 1.67 (↑)    | 0.000              | 0.16 (↓)    | 0.000            | 0.10 (↓)    |
| (−)      | [M − H] <sup>−</sup> | 881 | C16:0/C22:6          | 0.056         | 1.58 (ns)   | 0.005              | 3.83 (↑)    | 0.011            | 2.43 (↑)    |
| (−)      | [M − H] <sup>−</sup> | 883 | C18:1/C20:4          | 0.024         | 1.25 (↑)    | 0.000              | 4.23 (↑)    | 0.000            | 3.38 (↑)    |
| (−)      | [M − H] <sup>−</sup> | 885 | C18:0/C20:4          | 0.000         | 0.69 (↓)    | 0.000              | 5.80 (↑)    | 0.000            | 8.38 (↑)    |
| (−)      | [M − H] <sup>−</sup> | 887 | C18:0/C20:3          | 0.000         | 0.48 (↓)    | 0.038              | 1.17 (↑)    | 0.000            | 2.42 (↑)    |
| PG       |                      |     |                      |               |             |                    |             |                  |             |
| (−)      | [M − H] <sup>−</sup> | 747 | C16:0/C18:1          | 0.000         | 1.64 (↑)    | 0.026              | 0.72 (↓)    | 0.000            | 0.44 (↓)    |
| (−)      | [M − H] <sup>−</sup> | 773 | C18:1/C18:1          | 0.000         | 2.02 (↑)    | 0.000              | 0.22 (↓)    | 0.000            | 0.11 (↓)    |

PC, phosphatidylcholine; plasmeyl-PC, plasmeylphosphatidylcholine; plasmeyl-PE, plasmeylphosphatidylethanolamine; PE, phosphatidylethanolamine; PS, phosphatidylserine; PI, phosphatidylinositol; PG, phosphatidylglycerol.  
ns, no significant difference ( $p > 0.05$ ); ↑, significant difference ( $p < 0.05$ ) and relative fold change  $> 1$ ; ↓, significant difference ( $p < 0.05$ ) and relative fold change  $< 1$ .

**Table 4: PLS-DA model parameters using selected metabolomes and lipidomes for VIP cutoff values of 0, 0.7, 0.9, 1.0, 1.1, and 1.2**

| VIP cut-off values | Total no. of compounds | Compounds <sup>a</sup>                                         |                                                                  | $R^2Y$ | $Q^2Y$ | $R^2Y$ -intercept | $Q^2Y$ -intercept | Component No. |
|--------------------|------------------------|----------------------------------------------------------------|------------------------------------------------------------------|--------|--------|-------------------|-------------------|---------------|
|                    |                        | GC-MS                                                          | DI-MS                                                            |        |        |                   |                   |               |
| 0                  | 83                     | 1-39                                                           | 1-44                                                             | 0.982  | 0.957  | 0.371             | -0.299            | 3             |
| 0.7                | 75                     | 1-17, 21-24, 26-31, 33-37, 39                                  | 1-3, 5-12, 14-44                                                 | 0.984  | 0.959  | 0.355             | -0.444            | 3             |
| 0.9                | 63                     | 1, 2, 4, 6, 10-13, 15, 16, 21-23, 26, 27, 29-31, 33, 35-37, 39 | 1-3, 5-8, 10, 11, 14-44                                          | 0.985  | 0.962  | 0.267             | -0.292            | 3             |
| 1.0                | 48                     | 10, 13, 16, 21, 22, 26, 27, 30, 31, 33, 35, 37                 | 1, 3, 6-8, 10, 14-38, 40-44                                      | 0.986  | 0.981  | 0.053             | -0.318            | 2             |
| 1.1                | 27                     | 26, 27, 31, 35, 37                                             | 1, 6-8, 10, 14-17, 19, 22, 26, 27, 29, 30, 32, 33, 36-38, 41, 42 | 0.990  | 0.984  | 0.019             | -0.336            | 2             |
| 1.2                | 4                      | —                                                              | 8, 26, 30, 33                                                    | 0.852  | 0.776  | 0.097             | -0.331            | 3             |

<sup>a</sup> Compounds corresponding to numbers were listed in Supplementary Table S1 and S2.

For potential biomarker discovery, metabolites and lipids were selected with VIP values of  $>1.1$  in the PLS-

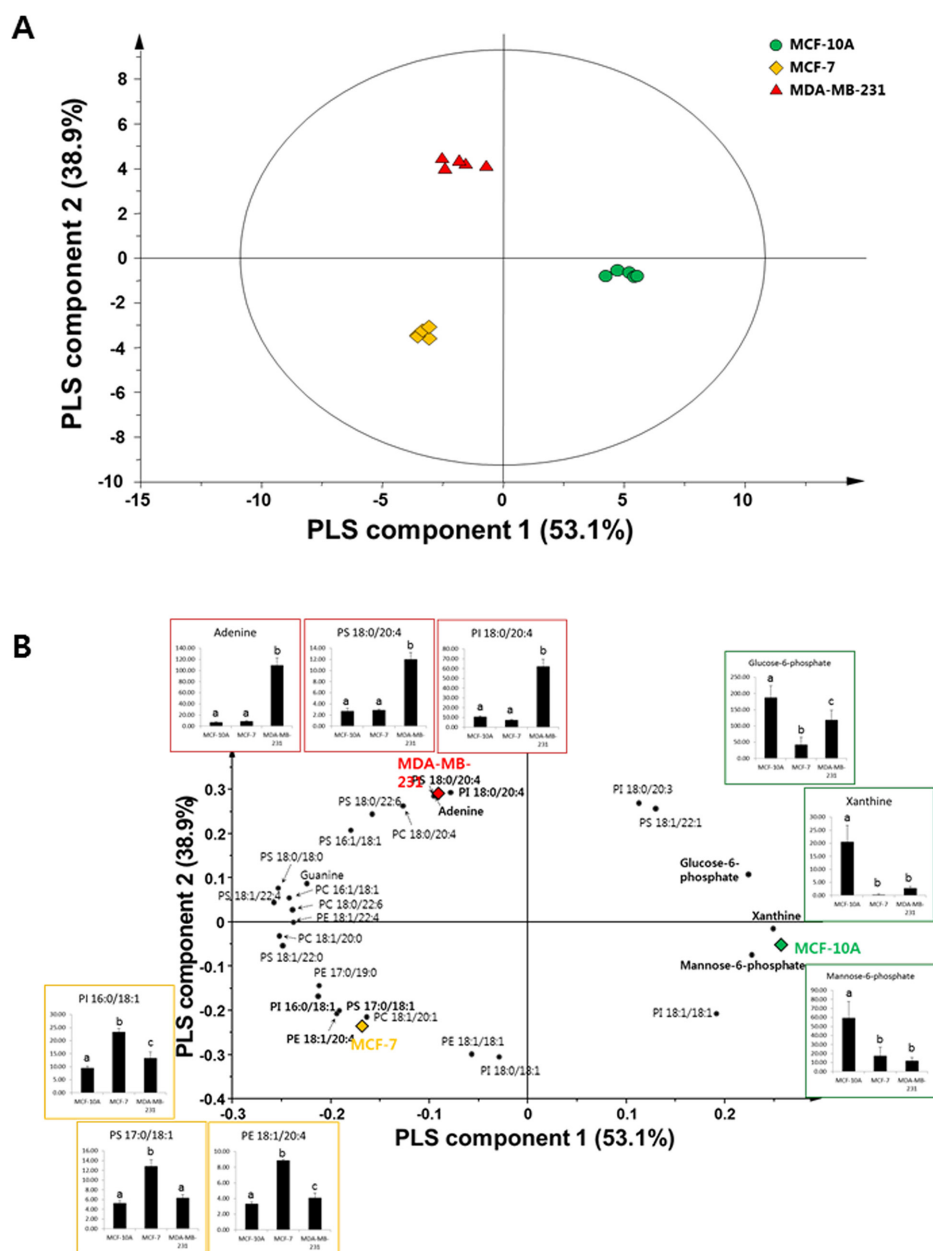

**Figure 2: A. PLS-DA-derived score plot for mammary epithelial and metastatic breast cancer cells ( $n = 5$  for each group). B. PLS-DA loading plot of variables with a VIP value of  $>1.1$  explaining the separation above.** The graphs show changes in major compounds in each group. Data represent mean values with error bars representing the standard deviation values. Different letters on the graph indicate statistically significant differences between samples based on ANOVA with Tukey's *post hoc* test. ●: MCF-10A; ◆: MCF-7; ▲: MDA-MB-231

phosphate, and mannose-6-phosphate were lower (all  $p$  values  $<0.02$ ) in MDA-MB-231 cells than in MCF-10A cells. The levels of xanthine, glucose-6-phosphate, and adenine were higher in MDA-MB-231 cells than in MCF-7 cells (all  $p$  values  $<0.03$ ). The levels of potential lipid biomarkers PS 18:1/22:4, PE 18:1/20:4, PI 16:0/18:1, PS 17:0/18:1, and PE 17:0/19:0 were all higher in slightly metastatic MCF-7 cells than in MCF-10A cells, with relative changes greater than 2.45-fold (all  $p$  values  $<0.001$ ). The levels of these lipids were higher in MCF-7 cells than in the other two cell types. The levels of PS

18:0/22:6, PS 18:0/20:4, PI 18:0/20:4, and PC 18:0/20:4 were higher while the level of PI 18:0/18:1 was lower in highly metastatic MDA-MB-231 cells than in MCF-10A cells. In particular, the level of PS 18:0/22:6 was highest in MDA-MB-231 cells, followed by MCF-7 and MCF-10A cells. Additionally, the levels of PS 18:0/20:4, PI 18:0/20:4, and PC 18:0/20:4 were markedly higher in the highly metastatic MDA-MB-231 cells than in MCF-7 cells, with relative changes of 4.15-, 8.38-, and 2.81-fold, respectively (all  $p$  values  $<0.001$ ). In contrast, the levels of PE 18:1/18:1 and PI 18:0/18:1 were markedly lower

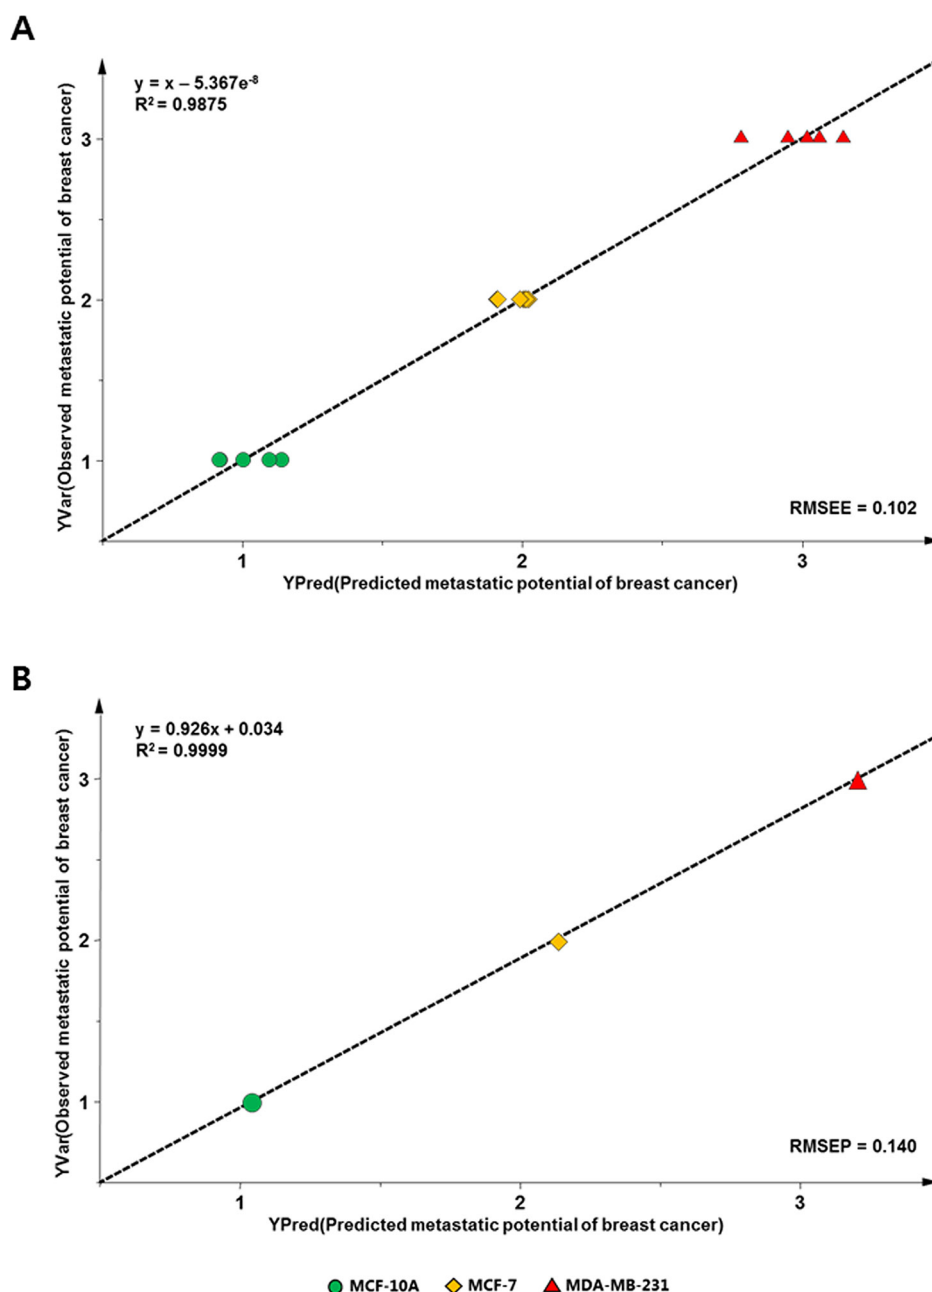

**Figure 3:** PLS-derived relationship between observed and predicted metastatic potentials of mammary epithelial and metastatic breast cancer cell samples using the training set A. and test set B. analyzed with variables having a VIP value of  $>1.1$ .

**Table 5: Validation of quality parameters of PLS projection to latent structures regression models derived from the data sets of the metabolomes and lipidomes in mammary epithelial and breast cancer cells**

| PLS parameters   | Values |
|------------------|--------|
| $R^2Y$           | 0.987  |
| $Q^2Y$           | 0.981  |
| $R^2Y$ intercept | 0.154  |
| $Q^2Y$ intercept | -0.452 |
| RMSEE            | 0.102  |
| RMSEP            | 0.140  |

There were two PLS components

**Table 6: Potential biomarkers of breast cancer metastasis identified by GC-MS and DI-MS, along with  $p$  values and relative changes in identified peak intensities**

| MCF-7/MCF-10A       |                  |                          |            | MDA-MB-231/MCF-10A  |                  |                          |            | MDA-MB-231/MCF-7    |                  |                          |            |
|---------------------|------------------|--------------------------|------------|---------------------|------------------|--------------------------|------------|---------------------|------------------|--------------------------|------------|
| Compound            | VIP <sup>a</sup> | Fold change <sup>b</sup> | $p$ -value | Compound            | VIP <sup>a</sup> | Fold change <sup>b</sup> | $p$ -value | Compound            | VIP <sup>a</sup> | Fold change <sup>b</sup> | $p$ -value |
| <b>GC-MS</b>        |                  |                          |            |                     |                  |                          |            |                     |                  |                          |            |
| Xanthine            | 1.20             | 0.02 (↓)                 | 0.000      | Xanthine            | 1.20             | 0.13 (↓)                 | 0.000      | Xanthine            | 1.20             | 8.35 (↑)                 | 0.000      |
| Glucose-6-phosphate | 1.15             | 0.22 (↓)                 | 0.000      | Glucose-6-phosphate | 1.15             | 0.63 (↓)                 | 0.011      | Glucose-6-phosphate | 1.15             | 2.84 (↑)                 | 0.002      |
| Mannose-6-phosphate | 1.14             | 0.29 (↓)                 | 0.002      | Mannose-6-phosphate | 1.14             | 0.20 (↓)                 | 0.000      | Mannose-6-phosphate | 1.14             | 0.68 (ns)                | 0.269      |
| Guanine             | 1.11             | 312.9 (↑)                | 0.002      | Guanine             | 1.11             | 371.5 (↑)                | 0.000      | Guanine             | 1.11             | 1.19 (ns)                | 0.452      |
| Adenine             | 1.11             | 1.23 (ns)                | 0.088      | Adenine             | 1.11             | 16.26 (↑)                | 0.000      | Adenine             | 1.11             | 13.18 (↑)                | 0.000      |
| <b>DI-MS</b>        |                  |                          |            |                     |                  |                          |            |                     |                  |                          |            |
| PS 18:1/22:4        | 1.24             | 2.45 (↑)                 | 0.000      | PS 18:0/22:6        | 1.14             | 4.17 (↑)                 | 0.000      | PS 18:0/20:4        | 1.11             | 4.15 (↑)                 | 0.000      |
| PE 18:1/20:4        | 1.20             | 2.68 (↑)                 | 0.000      | PS 18:0/20:4        | 1.11             | 4.43 (↑)                 | 0.000      | PE 18:1/18:1        | 1.11             | 0.29 (↓)                 | 0.000      |
| PI 16:0/18:1        | 1.19             | 2.46 (↑)                 | 0.000      | PI 18:0/20:4        | 1.10             | 5.80 (↑)                 | 0.000      | PI 18:0/20:4        | 1.10             | 8.38 (↑)                 | 0.000      |
| PS 17:0/18:1        | 1.18             | 2.46 (↑)                 | 0.000      | PC 18:0/20:4        | 1.10             | 4.48 (↑)                 | 0.000      | PC 18:0/20:4        | 1.10             | 2.81 (↑)                 | 0.000      |
| PE 17:0/19:0        | 1.15             | 2.62 (↑)                 | 0.000      | PI 18:0/18:1        | 1.10             | 0.16 (↓)                 | 0.000      | PI 18:0/18:1        | 1.10             | 0.10 (↓)                 | 0.000      |

<sup>a</sup> variable influence on projection.

<sup>b</sup>↑, significant difference ( $p < 0.05$ ) and relative fold change  $> 1$ ; ↓, significant difference ( $p < 0.05$ ) and relative fold change  $< 1$ .

in cells with high metastatic potential than in slightly metastatic cells.

## DISCUSSION

This study performed cellular metabolic and lipidomic profiling of breast cancer cells with different metastatic potentials. This is the first study to analyze the metabolic profiles of breast cancer cells with different metastatic potentials, and to compare normal controls with two breast cancer cell groups.

The levels of ornithine, adenine, and guanine were significantly higher in highly metastatic cancer cells (MDA-MB-231) than in normal cells (MCF-10A). These metabolites were also found to be significantly elevated in breast cancer tissue compared to normal tissue in a previous study that investigated a large cohort of breast cancer cases [8]. Via the action of ornithine decarboxylase (ODC), ornithine is the starting point for the synthesis of polyamines that are associated with tumor promotion and progression [18]. That study found that the level of ODC expression was highest in MDA-MB-231 cells, which implies that ornithine plays an important role in determining tumor growth and aggressiveness. Increase in adenine has also been found in human gastric cancer cells, and it was speculated that this phenomenon is necessary for ATP transfer and synthesizing nucleic acids for abnormal cell proliferation [19]. Guanine is reportedly the most readily oxidized base in cancer cells, which makes it vulnerable to DNA mutations [20]. Furthermore, adenine and guanine are obtained from inosine monophosphate during purine metabolism. Imbalanced enzymatic activities during purine metabolism, such as a decrease in xanthine oxidase, were found to be associated with the transformation and progression of cancer cells, suggesting that there is a correlation between increase in adenine and guanine and cancer cell metastasis [21]. A metabolomic study using mouse tumor models with different metastatic potentials found that the level of guanine was higher in highly metastatic cell lines (4TO7, 66cl4, and 4T1) than in a slightly metastatic cell line (168FARN) [22]. This implies that there is a relationship between changes in purine metabolism and the metastatic potential of breast cancer cells.

Aminoacyl-tRNA biosynthesis was found to be activated in breast cancer tissues in a previous study of breast cancer and normal tissues [8]. In our study, these amino acids were increased in slightly metastatic cells (MCF-7), but their levels were at control levels in MDA-MB-231 cells with a high metastatic potential. Lower levels in cells with greater metastasis could be due to their greater consumption of amino acids [22]. In particular, among amino acids, glutamine has been known to be a major source of carbon for fatty acid synthesis in cancer cells with defective mitochondria, and these fatty acids can be used for energy storage [23].

The level of PE 18:1/18:1 was higher in MCF-7 cells than in MCF-10A and MDA-MB-231 cells in our study. The level of PE 18:1/18:1 was previously found to be higher in T-47D cells than in MDA-MB-231 cells [12]. In addition, the level of plasmalogen-PE 18:0/20:4 was significantly higher in MDA-MB-231 cells but significantly lower in MCF-7 cells than in MCF-10A cells. These differences may be associated with differences in the hormonal status and metastatic potential between breast cancer cell lines. It was reported that the levels of PE were higher in ER<sup>+</sup> hormone-sensitive cell lines (MCF-7, LCC2, and MIIII) than in ER<sup>-</sup> hormone-resistant cell lines (MDA-MB-231 and MDA-MB-435), whereas plasmalogen-PE was either absent or present only at a very low level in the ER<sup>+</sup> cell lines, but was present at a significant level in ER<sup>-</sup> cell lines [24].

Moreover, it was found for the first time that the levels of PG 16:0/18:1 and PG 18:1/18:1 were higher in MCF-7 cells but lower in MDA-MB-231 cells than in MCF-10A cells. PG is an important precursor of cardiolipin (CL), which plays a critical role in mitochondrial structure and function. PG deficiency results in CL deficiency and it may cause mitochondrial dysfunction in highly metastatic cancer cells [25].

Most phospholipids are more abundant in breast cancer cells than in normal cells. A previous study found similar results in human breast cancer tissues [10]. It was reported that the levels of membrane phospholipids, including PC, PE, PI, SM, and ceramides, were higher in breast cancer tissue than in normal tissue samples, with the levels being maximal in the most aggressive tumors. It has been suggested that overexpression of fatty acid synthase plays an important role in the tumorigenesis, and that *de novo* synthesized fatty acids are required for the rapid proliferation of cancer cells. High levels of lipogenic enzymes and related gene expression were observed in several types of cancer cells; this was especially true for *ERLIN2*, a lipogenic gene found in breast cancer cells [26, 27]. The most significantly increased saturated fatty acids were palmitic (C16:0) and stearic (C18:0) acids, and the most increased unsaturated fatty acid was arachidonic acid (C20:4) in breast cancer tissue, whose level increased with cancer progression [10]. We found that the levels of PS 18:0/20:4, PI 18:0/20:4, and PC 18:0/20:4 were markedly higher in highly metastatic MDA-MB-231 cells than in slightly metastatic MCF-7 cells, with no significant differences between MCF-7 cells and normal MCF-10A cells. Thus, those compounds can be suggested as potential biomarkers for metastatic potential of breast cancer.

Various predictive models and markers of cancer metastasis have been developed previously. Many recent studies have shown that levels of circulating tumor cells (CTCs) might be associated with the metastatic spread of various types of carcinomas [28, 29]. In addition, gene-expression profiling of breast cancer can be used to predict the risk of metastasis. A large amount of data has been

generated for breast cancer, relating expression data to histological subtype [30, 31], site of tumor metastasis [32, 33], and metastatic potential [34, 35]. Circulating cell-free DNA, which carries tumor-specific alterations (circulating tumor DNA), was recently investigated in advanced cancer patients as an early-stage diagnostic biomarker [36, 37]. In present study, we demonstrated a PLSR model to predict metastasis of breast cancer based on metabolic and lipidomic profiles for the first time. Since whole data of metabolites and lipids are used for modeling, the PLSR model established with multivariate leads to better precise and accurate prediction than univariate models.

Metabolomic analysis is complementary to genomic and proteomic approaches, and is being used to discover prognostic biomarkers in cancer. The present study simultaneously performed comprehensive profiling of alcohols, amino acids, fatty acids, organic acids, purines, sugars, and intact lipid species in breast cancer cells with different metastatic potentials. A predictive model was also developed. This resulted in adenine, guanine, xanthine, glucose-6-phosphate, and mannose-6-phosphate being identified as the novel potential biomarkers for the detection of the extent of breast cancer metastasis. In addition, this is the first report of the levels of PS 18:0/20:4, PI 18:0/20:4, and PC 18:0/20:4 being higher in highly metastatic cells (MDA-MB-231 cells) than in slightly metastatic cells (MCF-7 cells). Further study of a large cohort of breast cancer patients with different metastatic potentials should be conducted to verify these biomarkers.

The PLS regression model adopted in this study was able to successfully differentiate normal, slightly metastatic, and highly metastatic breast cancer cells with a high predictive accuracy. To establish an accessible and easily applicable data set for this predictive model, it is necessary to isolate primary human mammary cells from breast tissue taken from breast cancer patients. Breast tissues are generally dissociated by enzymatic digestion (most efficiently when using collagenase III), and then a differential centrifugation technique is applied to obtain the separated cells. The pellet consisting of epithelial cells can be utilized for metabolic profiling to predict the metastasis stage of breast cancer [38–40]. The metabolic and lipidomic approaches of this study provide an in-depth understanding of metabolism in breast cancer metastasis. It also provides valuable new information for assessing the metastatic potential of breast cancer in patients and for developing potential therapeutic agents.

## MATERIALS AND METHODS

### Chemicals and reagents

Butylated hydroxytoluene (BHT), myristic- $d_{27}$  acid, methoxylamine hydrochloride, and pyridine were purchased from Sigma-Aldrich (St. Louis, MO). BSTFA

[N,O-Bis(trimethylsilyl) trifluoroacetamide] containing 1% TMCS (trimethylchlorosilane) was purchased from Alfa Aesar (Ward Hill, MA). HPLC grade methanol, chloroform, and water were purchased from Fisher Scientific (Pittsburgh, PA). HPLC grade hexane was purchased from Honeywell Burdick & Jackson (Muskegon, MI).

### Cell culture

Human breast cancer cell lines MCF-7 and MDA-MB-231 (American Type Culture Collection, Manassas, VA) and the immortalized normal breast epithelial cell line, MCF-10A (American Type Culture Collection, Manassas, VA), were used for the experiments. MCF-7 and MDA-MB-231 cells originated from a human invasive adenocarcinoma. MCF-7 cells have slightly metastatic potential and belong to the luminal A group, and are known to express estrogen and progesterone receptors. MDA-MB-231 cells are highly metastatic and belong to the triple-negative basal-like group. MCF-7 and MDA-MB-231 cells were cultured in RPMI medium supplemented with 10% (v/v) heat-inactivated fetal bovine serum and 1% penicillin-streptomycin (Hyclone labs, Logan, UT). MCF-10A cells were cultured in DMEM/F12 medium supplemented with 5% horse serum (ThermoFisher Scientific, Waltham, MA), 20 ng/mL epidermal growth factor (Peprotech, Rocky Hill, NJ), 0.5 mg/mL hydrocortisone (Sigma-Aldrich, St. Louis, MO), 100 ng/mL cholera toxin (Sigma-Aldrich, St. Louis, MO), 10  $\mu$ g/mL insulin (Sigma-Aldrich, St. Louis, MO), and 1% penicillin-streptomycin at 37°C in a humidified incubator with 5% CO<sub>2</sub>. The cells were sub-cultured with a seeding density of  $1 \times 10^6$  cells/mL and were grown to approximately 90% confluence for metabolic and lipidomic profiling experiments.

### Harvesting cell samples

Cells were detached using a  $1 \times$  trypsin solution at 37°C in a humidified atmosphere of 5% CO<sub>2</sub>. After incubation, MCF-10A cells were resuspended in resuspension media and centrifuged at  $150 \times g$  for 3 min; MCF-7 and MDA-MB-231 cell lines were resuspended in growth media and centrifuged at  $185 \times g$  for 3 min. The media was aspirated, and the cell pellet was washed twice with 1.5 mL ice-cold phosphate-buffered saline (PBS) to remove extracellular metabolites. After the final wash step, cells were suspended in PBS and transferred into 2 mL Eppendorf tubes. Cell suspensions were immediately frozen in liquid nitrogen and stored at  $-80^\circ\text{C}$  until analysis.

### Sample preparation and metabolite extraction

The cell suspensions were lysed by two freeze-thaw cycles, followed by sonication on ice. Briefly, cells were thawed in a 4°C water bath, vortexed vigorously,

and sonicated for 20 min. They were then transferred to liquid nitrogen for 60 min, thawed in a 37°C water bath for 30 min, and briefly vortexed. This freeze-thaw cycle was repeated once for complete cell disruption, and was followed by an additional sonication for 10 min. Protein concentrations were determined using the Bio-Rad protein assay kit (Thermo Scientific, Rockford, IL) with bovine serum albumin (BSA) standards for normalization. The samples were centrifuged at  $18,500 \times g$  for 10 min at 4°C, dried in a freeze dryer (IlShinBioBase, Dongduchun city, Kyunggi-do, Korea), and stored at -70°C until analysis. Each sample was prepared and analyzed in quintuplicate.

The samples were extracted using a modified Folch procedure [41]. In brief, ice-cold chloroform (1 mL) and methanol (0.5 mL), with 0.1% BHT, were added to the dried cells and vortexed for 20 sec. The mixture was then sonicated in a 4°C water bath for 30 min and incubated on ice for 60 min with shaking. Phase separation was induced by adding 380 µL of water with 0.1% BHT, followed by incubation on ice for 10 min with shaking. The mixture was then centrifuged at  $18,500 \times g$  for 10 min at 4°C. The mixture was split into two aliquots, the upper (methanol) phase for GC-MS analysis, and the lower (chloroform) phase for lipid analysis using nano electrospray ionization mass spectrometry (nanoESI-MS). The extracts were passed through 0.2 µm PTFE syringe filter (Whatman, Maidstone, UK) and then evaporated with nitrogen gas. The dried chloroform fraction was resuspended in 100 µL of methanol-chloroform (9:1, v/v) containing 7.5 mM ammonium acetate buffer solution for analysis, and the dried methanol fraction was used for derivatization procedures. All extracts were stored at -80°C before analysis.

### GC-MS analysis

To perform derivatization of the extracted sample, 30 µL of 20,000 µg/mL methoxylamine hydrochloride in pyridine, 50 µL of BSTFA containing 1% TMCS, and 10 µL of myristic- $d_{27}$  acid (500 µg/mL as an internal standard) were added to dried samples. The samples were then incubated for 60 min at 65°C. Finally, each extracted sample was used for GC-MS analysis.

GC-MS analysis was performed using a 7890A GC (Agilent Technologies, CA) model equipped with an autosampler (7683 B series, Agilent Technologies), and a 5975C mass selective detector (Agilent Technologies, CA). An injector volume of 1.0 µL was injected into a split/splitless inlet at 250°C. Helium was used as the carrier gas with a constant flow rate of 1.0 mL/min. A fused silica capillary column of 5% phenylmethylpolysiloxane phase (DB-5, Agilent Technologies) with dimensions 30 m  $\times$  0.25 mm i.d.  $\times$  0.25 µm film thickness was used for analysis. The auxiliary, MS source, and MS quad temperatures were set to 280, 230, and 150°C, respectively. The mass range was 50–700 Da, and data were obtained in full scan

mode. Electron impact ionization mode, with ionization energy of 70 eV and a split ratio of 1:10, were used for GC-MS detection. The initial oven temperature was set to 70°C and was programmed to increase to 190°C (at 5°C/min) and then 240°C (at 6°C/min), and finally 280°C (at 5°C/min). The metabolites were identified by comparison of mass spectra with those of NIST-Wiley Mass Spectra Library, Human Metabolome Database (HMDB; <http://www.hmdb.ca/>), and Golm metabolome Database (GMD; [gmd.mpimp-golm.mpg.de/](http://gmd.mpimp-golm.mpg.de/)).

### Lipid analysis

Lipid extracts were analyzed in positive and negative ion modes via nanoESI-MS using a linear ion-trap mass spectrometer (LTQ-XL, ThermoFisher Scientific, San Jose, CA) equipped with an automated nanoinfusion/nanospray source (TriVersa NanoMateSystem, Advion Biosciences, Ithaca, NY). The spray parameters were set with a gas pressure of 0.2 psi and ionization voltage applied at 1.2 kV for positive and negative ion modes. The ion source was controlled using Chipsoft 8.3.1 software (Advion Biosciences). Aliquots (30 µL) were loaded into a 96-well plate, which was placed on a Nanomate cooling plate set to 4°C and 10 µL of each sample was infused into a mass spectrometer via an Advion ESI chip with 5.5 µm (inner diameter) emitter nozzles.

Full-scan spectra were collected in mass-to-charge ratio ( $m/z$ ) ranges of 400–1200 and 500–1300, for positive and negative ion modes, respectively. The mass spectra of each sample were acquired in profile mode over a 2 min period. The capillary temperature was set to 200°C; the capillary and tube-lens voltages were set to 32 V and 95 V, respectively, in positive ion mode, and to -41 V and -93 V in negative ion mode. The target automatic-gain-control values for full MS and multistage MS were 30,000 and 1,000, respectively. MS/MS was applied to pooled samples for identification of lipid species. The normalized collision energy was set to 35%, with an isolated width of 1.5  $m/z$  units and a charge state of 1. The dynamic exclusion parameters were a repeat duration of 60 sec, exclusion duration of 60 sec, and an exclusion list size of 50.

Lipid species were identified based on the MS/MS spectra of an authentic reference and an in-house MS/MS library. In addition, databases of Lipidmaps (<http://www.lipidmaps.org/>) and LipidBlast were used to match with spectra.

### Data acquisition and processing

The raw data files (\*.raw) of lipids acquired from analyzed samples were converted into \*.mzXML format using Proteo Wizard MSConvert [42]. Then, mass spectra were processed with Expressionist MSX software (version 2013.0.39, Genedata, Basel, Switzerland). The spectra

scans were averaged and then spectrum smoothing, *m/z* alignment, and baseline subtraction were performed. Then, the data matrices were exported from Expressionist MSX as Excel files. For the relative quantification of metabolomes and lipidomes, relative levels of metabolites and lipids were calculated by dividing the peak intensity of the internal standard (PE 17:0/17:0) by the total protein content.

Fold changes, Student's *t*-tests (at a threshold of  $p < 0.05$ ), and pathway analysis were assessed using MetaboAnalyst (version 3.0; <http://www.metaboanalyst.ca>), a web-based software tool for metabolomics analysis. Significant differences were evaluated by a one-way analysis of variance (ANOVA) with a Tukey's *post-hoc* test using SPSS software (version 21, IBM, Somers, NY) and different letters indicate statistically significant differences between samples. The level of statistical significance was set at  $p < 0.05$ .

For multivariate statistical analysis, partial least-squares discriminant analysis (PLS-DA) and partial least-squares projection to latent structures (PLS) regression (PLSR) were performed using SIMCA-P+ software (version 13.0, Umetrics, Umeå, Sweden) using mean-centered and unit variance-scaled data. The PLSR model was validated using the following steps: (i) cross-validation to assess the predictive power with  $Q^2Y$  (predicted variation, or goodness of prediction) and  $R^2Y$  (explained variation, or goodness of fit); (ii) response permutation testing to assess the statistical significance of the estimated predictive power with an  $R^2Y$  intercept and  $Q^2Y$  intercept on the validation plots; and (iii) external validation to test predictive performance by importing the lipid profiles of unknown samples [16].

## ACKNOWLEDGMENTS

This work was supported by the National Research Foundation of Korea (NRF) grant funded by the Korean government (MSIP) (NRF-2015R1A5A1008958).

## CONFLICTS OF INTEREST

The authors declare no conflicts of interest in regards to this manuscript.

## REFERENCES

1. Youlten DR, Cramb SM, Yip CH, Baade PD. Incidence and mortality of female breast cancer in the Asia-Pacific region. *Cancer Biol Med*. 2014; 11: 101-115.
2. Early Breast Cancer Trialists' Collaborative Group. Effects of chemotherapy and hormonal therapy for early breast cancer on recurrence and 15-year survival: an overview of the randomised trials. *Lancet*. 2005; 365: 1687-1717.
3. Weigelt B, Peterse JL, Van't Veer LJ. Breast cancer metastasis: markers and models. *Nat Rev Cancer*. 2005; 5: 591-602.
4. Qin L, Liu Z, Chen H, Xu J. The steroid receptor coactivator-1 regulates twist expression and promotes breast cancer metastasis. *Cancer Res*. 2009; 69: 3819-3827.
5. Chan ECY, Koh PK, Mal M, Cheah PY, Eu KW, Backshall A, Cavill R, Nicholson JK, Keun HC. Metabolic profiling of human colorectal cancer using high-resolution magic angle spinning nuclear magnetic resonance (HR-MAS NMR) spectroscopy and gas chromatography mass spectrometry (GC/MS). *J Proteome Res*. 2008; 8: 352-361.
6. Denkert C, Budczies J, Kind T, Weichert W, Tablack P, Schouli J, Niesporek S, Konsgen D, Dietel M, Fiehn O. Mass spectrometry-based metabolic profiling reveals different metabolite patterns in invasive ovarian carcinomas and ovarian borderline tumors. *Cancer Res*. 2006; 66: 10795-10804.
7. Urayama S, Zou W, Brooks K, Tolstikov V. Comprehensive mass spectrometry based metabolic profiling of blood plasma reveals potent discriminatory classifiers of pancreatic cancer. *Rapid Commun Mass Spectrom*. 2010; 24: 613-620.
8. Budczies J, Denkert C, Muller BM, Brockmoller SF, Klauschen F, Györfy B, Dietel M, Richter-Ehrenstein C, Marten U, Salek RM, Griffin JL, Hilvo M, Oresic M, et al. Remodeling of central metabolism in invasive breast cancer compared to normal breast tissue - a GC-TOFMS based metabolomics study. *BMC Genomics*. 2012; 13: 334-2164-13-334.
9. Fan Y, Zhou X, Xia TS, Chen Z, Li J, Liu Q, Alolga RN, Chen Y, Lai MD, Li P, Zhu W, Qi LW. Human plasma metabolomics for identifying differential metabolites and predicting molecular subtypes of breast cancer. *Oncotarget*. 2016; 7: 9925-9938. doi: 10.18632/oncotarget.7155.
10. Hilvo M, Denkert C, Lehtinen L, Muller B, Brockmoller S, Seppanen-Laakso T, Budczies J, Bucher E, Yetukuri L, Castillo S, Berg E, Nygren H, Sysi-Aho M, et al. Novel theranostic opportunities offered by characterization of altered membrane lipid metabolism in breast cancer progression. *Cancer Res*. 2011; 71: 3236-3245.
11. Dória ML, Cotrim Z, Macedo B, Simões C, Domingues P, Helguero L, Domingues MR. Lipidomic approach to identify patterns in phospholipid profiles and define class differences in mammary epithelial and breast cancer cells. *Breast Cancer Res Treat*. 2012; 133: 635-648.
12. Dória ML, Cotrim CZ, Simões C, Macedo B, Domingues P, Domingues MR, Helguero LA. Lipidomic analysis of phospholipids from human mammary epithelial and breast cancer cell lines. *J Cell Physiol*. 2013; 228: 457-468.
13. Bando H, Toi M, Kitada K, Koike M. Genes commonly upregulated by hypoxia in human breast cancer cells MCF-7 and MDA-MB-231. *Biomed Pharmacother*. 2003; 57: 333-340.

14. Tang F, Zhang R, He Y, Zou M, Guo L, Xi T. MicroRNA-125b induces metastasis by targeting STARD13 in MCF-7 and MDA-MB-231 breast cancer cells. *PLoS One*. 2012; 7: e35435.
15. Vercoutter-Edouart AS, Lemoine J, Le Bourhis X, Louis H, Boilly B, Nurcombe V, Revillion F, Peyrat JP, Hondermarck H. Proteomic analysis reveals that 14-3-3sigma is down-regulated in human breast cancer cells. *Cancer Res*. 2001; 61: 76-80.
16. Xu T, Holzapfel C, Dong X, Bader E, Yu Z, Prehn C, Perstorfer K, Jaremek M, Roemisch-Margl W, Rathmann W. Effects of smoking and smoking cessation on human serum metabolite profile: results from the KORA cohort study. *BMC Med*. 2013; 11: 1-14.
17. Eriksson L, Byrne T, Johansson E, Trygg J, Vikström C. Multi-and megavariable data analysis basic principles and applications. *Umetrics Academy*. 2013.
18. Deng W, Jiang X, Mei Y, Sun J, Ma R, Liu X, Sun H, Tian H, Sun X. Role of ornithine decarboxylase in breast cancer. *Acta Biochim Biophys Sin*. 2008; 40: 235-243.
19. Song H, Peng J, Dong-Sheng Y, Yang Z, Liu H, Zeng Y, Shi X, Lu B. Serum metabolic profiling of human gastric cancer based on gas chromatography/mass spectrometry. *Braz J Med Biol Res*. 2012; 45: 78-85.
20. Bacolla A, Temiz NA, Yi M, Ivanic J, Cer RZ, Donohue DE, Ball EV, Mudunuri US, Wang G, Jain A. Guanine holes are prominent targets for mutation in cancer and inherited disease. *PLoS Genet*. 2013; 9: e1003816.
21. Weber G. Enzymes of purine metabolism in cancer. *Clin Biochem*. 1983; 16: 57-63.
22. Lu X, Bennet B, Mu E, Rabinowitz J, Kang Y. Metabolomic changes accompanying transformation and acquisition of metastatic potential in a syngeneic mouse mammary tumor model. *J Biol Chem*. 2010; 285: 9317-9321.
23. Mullen AR, Wheaton WW, Jin ES, Chen P, Sullivan LB, Cheng T, Yang Y, Linehan WM, Chandel NS, DeBerardinis RJ. Reductive carboxylation supports growth in tumour cells with defective mitochondria. *Nature*. 2012; 481: 385-388.
24. Sterin M, Cohen JS, Ringel I. Hormone sensitivity in the phospholipid profiles of breast cancer cell lines. *Breast Cancer Res Treat*. 2004; 87: 1-11.
25. Nie J, Hao X, Chen D, Han X, Chang Z, Shi Y. A novel function of the human CLS1 in phosphatidylglycerol synthesis and remodeling. *Biochim Biophys Acta*. 2010; 4: 438-445.
26. Hu F, Zhang Y, Song Y. Lipid metabolism, metabolic syndrome, and cancer. *INTECH Open Access Publisher*. 2013.
27. Wang G, Liu G, Wang X, Sethi S, Ali-Fehmi R, Abrams J, Zheng Z, Zhang K, Ethier S, Yang ZQ. ERLIN2 promotes breast cancer cell survival by modulating endoplasmic reticulum stress pathways. *BMC Cancer*. 2012; 12: 225-2407-12-225.
28. Allard WJ, Matera J, Miller MC, Repollet M, Connelly MC, Rao C, Tibbe AG, Uhr JW, Terstappen LW. Tumor cells circulate in the peripheral blood of all major carcinomas but not in healthy subjects or patients with nonmalignant diseases. *Clin Cancer Res*. 2004; 10: 6897-6904.
29. Paterlini-Brechot P, Benali NL. Circulating tumor cells (CTC) detection: clinical impact and future directions. *Cancer Lett*. 2007; 253: 180-204.
30. Sorlie T, Perou CM, Tibshirani R, Aas T, Geisler S, Johnsen H, Hastie T, Eisen MB, van de Rijn M, Jeffrey SS, Thorsen T, Quist H, Matese JC, et al. Gene expression patterns of breast carcinomas distinguish tumor subclasses with clinical implications. *Proc Natl Acad Sci U S A*. 2001; 98: 10869-10874.
31. Sorlie T, Tibshirani R, Parker J, Hastie T, Marron JS, Nobel A, Deng S, Johnsen H, Pesich R, Geisler S, Demeter J, Perou CM, Lonning PE, et al. Repeated observation of breast tumor subtypes in independent gene expression data sets. *Proc Natl Acad Sci U S A*. 2003; 100: 8418-8423.
32. Minn AJ, Gupta GP, Siegel PM, Bos PD, Shu W, Giri DD, Viale A, Olshen AB, Gerald WL, Massagué J. Genes that mediate breast cancer metastasis to lung. *Nature*. 2005; 436: 518-524.
33. Bos PD, Zhang XH, Nadal C, Shu W, Gomis RR, Nguyen DX, Minn AJ, van de Vijver, Marc J, Gerald WL, Foekens JA. Genes that mediate breast cancer metastasis to the brain. *Nature*. 2009; 459: 1005-1009.
34. Feng Y, Sun B, Li X, Zhang L, Niu Y, Xiao C, Ning L, Fang Z, Wang Y, Zhang L. Differentially expressed genes between primary cancer and paired lymph node metastases predict clinical outcome of node-positive breast cancer patients. *Breast Cancer Res Treat*. 2007; 103: 319-329.
35. Desmedt C, Piette F, Loi S, Wang Y, Lallemand F, Haibe-Kains B, Viale G, Delorenzi M, Zhang Y, d'Assignies MS, Bergh J, Lidereau R, Ellis P, et al. Strong time dependence of the 76-gene prognostic signature for node-negative breast cancer patients in the TRANSBIG multicenter independent validation series. *Clin Cancer Res*. 2007; 13: 3207-3214.
36. Dawson S, Tsui DW, Murtaza M, Biggs H, Rueda OM, Chin S, Dunning MJ, Gale D, Forshew T, Mahler-Araujo B. Analysis of circulating tumor DNA to monitor metastatic breast cancer. *N Engl J Med*. 2013; 368: 1199-1209.
37. Elshimali YI, Khaddour H, Sarkissyan M, Wu Y, Vadgama JV. The clinical utilization of circulating cell free DNA (CCFDNA) in blood of cancer patients. *Int J Mol Sci*. 2013; 14: 18925-18958.
38. Speirs V, Green AR, White MC. Collagenase III: a superior enzyme for complete disaggregation and improved viability of normal and malignant human breast tissue. *In Vitro Cell Dev Biol Anim*. 1996; 32: 72-74.
39. Burdall SE, Hanby AM, Lansdown MRJ, Speirs V. Breast cancer cell lines: friend or foe? *Breast Cancer Res*. 2003; 5: 89-95.

40. Mitra A, Mishra L, Li S. Technologies for deriving primary tumor cells for use in personalized cancer therapy. *Trends Biotechnol.* 2013; 31: 347-354.
41. Folch J, Lees M, Sloane-Stanley G. A simple method for the isolation and purification of total lipids from animal tissues. *J Biol Chem.* 1957; 226: 497-509.
42. Parry RM, Galhena AS, Gamage CM, Bennett RV, Wang MD, Fernández FM. OmniSpect: an open MATLAB-based tool for visualization and analysis of matrix-assisted laser desorption/ionization and desorption electrospray ionization mass spectrometry images. *J Am Soc Mass Spectrom.* 2013; 24: 646-649.
